# Supplementary material for: Cooperation of the NEIL3 and Fanconi anemia/BRCA pathways in interstrand crosslink repair
Source: PubMed Central journal article supplement — Nucleic Acids Res. 2020 Jan 25;48(6):3014–28. doi: 10.1093/nar/gkaa038 (PMC7102959; doi:10.1093/nar/gkaa038), 2020-01-25
Supplement: gkaa038_supplemental_file.pdf [file gkaa038_supplemental_file.pdf]

# Cooperation of the NEIL3 and Fanconi Anemia/BRCA Pathways in Interstrand Crosslink Repair

Niu Li<sup>1,2,3</sup>, Jian Wang<sup>1</sup>, Susan S. Wallace<sup>4</sup>, Jing Chen<sup>2</sup>, Jia Zhou<sup>3,\*</sup>, Alan D. D'Andrea<sup>3,5,6,\*</sup>

1 Department of Medical Genetics and Molecular Diagnostic Laboratory, Shanghai Children's Medical Center, Shanghai Jiaotong University School of Medicine, Shanghai, China

2 Key Laboratory of Pediatric Hematology and Oncology Ministry of Health, Department of Hematology and Oncology, Shanghai Children's Medical Center, Shanghai Jiao Tong University School of Medicine, Shanghai, China

3 Department of Radiation Oncology, Dana-Farber Cancer Institute, Harvard Medical School, Boston, MA, USA

4 Department of Microbiology and Molecular Genetics, University of Vermont, Burlington, VT, USA

5 Center for DNA Damage and Repair, Dana-Farber Cancer Institute, Harvard Medical School, Boston, MA, USA

6 Susan F. Smith Center for Women's Cancers, Dana-Farber Cancer Institute, Harvard Medical School, Boston, MA, USA

\* co-corresponding authors

## Corresponding Authors:

Alan D. D'Andrea, M.D.

Director: Center for DNA Damage and Repair  
The Fuller-American Cancer Society Professor  
Harvard Medical School

Chief, Division of Genomic Stability and DNA Repair  
Department of Radiation Oncology  
Dana-Farber Cancer Institute, HIM243

450 Brookline Ave.

Boston, MA 02215

617-632-2080

FAX: 617-632-6069

Alan\_Dandrea@dfci.harvard.edu

Jia Zhou, Ph.D.

Department of Radiation Oncology  
Dana-Farber Cancer Institute  
Harvard Medical School

617-582-8523

jia\_zhou@dfci.harvard.edu

**Running Title:** NEIL3 pathway is prioritized in psoralen-ICL Repair

**Key Words:** NEIL3, Fanconi Anemia, Psoralen Interstrand crosslink

## Supplementary Figure Legends

**Figure S1: Sensitivity of NEIL3 depleted cells to DNA damaging agents.** (A) The viability of WT and *NEIL3*<sup>-/-</sup> HeLa cells after the treatment of various DNA damaging agents, including PUVA, MMC, cisplatin, HU, camptothecin, IR, UVB, psoralen, and UVA. (B) Cell viability was monitored in HeLa or U2OS cells after treatment of psoralen or UVA. (C) Cell viability was measured in the SV40-immortalized WT and *Neil3*<sup>-/-</sup>-MEF cells after treatment with PUVA, psoralen or UVA. (D) Cell viability was monitored in HeLa-WT, HeLa- *FANCA*<sup>-/-</sup>, and HeLa-*NEIL3*<sup>-/-</sup> cells after MMC or cisplatin treatment. (E) Cell viability was monitored after NEIL3 knockdown and PUVA treatment in PD20 plus empty vector (PD20-EV) and PD20 plus FANCD2 (PD20-D2) cells. Shown on the right, immunoblotting was used to evaluate the knockdown efficiency of NEIL3 and to evaluate FANCD2 complementation. (F) MMC and cisplatin sensitivities were monitored after knockdown of FANCD2 in HeLa-WT and HeLa-*NEIL3*<sup>-/-</sup> cells, respectively. Data are mean  $\pm$  s.e.m. from three independent experiments. (G) Sensitivity of HeLa cells to PUVA after NEIL1 or control knockdown. HeLa cells were transfected with control or NEIL1 siRNA (20 nM siRNA, see Table S1 for sequence). Cells were treated with PUVA using indicated doses, and cell viability was measured 4 days after treatment. NEIL1 knockdown efficiency was evaluated at mRNA level, and NEIL3 mRNA level was determined after knockdown of NEIL1 in HeLa cells by quantitative RT-PCR. Primer sequences can be found in the Materials and Methods.

**Figure S2: Response of NEIL3 to psoralen-ICLs was independent of cell cycle.** (A) The NEIL3 expression level was determined in WT and *FANCA*<sup>-/-</sup> HeLa cells after treatment with indicated dose of psoralen or UVA (0.8 J/cm<sup>2</sup>). (B) The protein expression level of NEIL3 was increased after FANCD2 complementation in PD20 cells and FANCG complementation in PD326 cells. (C) The *NEIL3* mRNA level was determined in wild-type and FA/BRCA-deficient (*FANCD2*<sup>-/-</sup> or *FANCA*<sup>-/-</sup>) cells. (D) HeLa cells were synchronized by double-thymidine blocks (2 mM) and released into fresh medium, and cell cycle were analyzed at 0, 2, 4, 8 h after releasing. NEIL3 protein levels were determined at different cell cycle stages. (E, F) Cell cycle was analyzed in HeLa/HeLa-*FANCA*<sup>-/-</sup> and U2OS/U2OS-*FANCD2*<sup>-/-</sup> cells.

(G) WT or *FANCD2*<sup>-/-</sup> U2OS (left) and WT or *NEIL3*<sup>-/-</sup> HeLa cells (right) were treated with 20  $\mu$ M MG-132 and collected at indicated time. Cell lysates were analyzed by Western blot using indicated antibody. (H) Left, co-IP was performed using normal IgG, anti-NEIL3, anti-FANCD2, or anti-FANCG antibodies in 293T cells lysates. The input and co-IP samples were analyzed by Western blot using indicated antibodies. The FANCA-FANCD2 and FANCA-FANCG interactions served as positive controls. Right, 293T cells were transiently transfected with indicated plasmids, and one group was treated with 100 ng/ml MMC for 6 h. The input and co-IP samples were analyzed by Western blot using anti-FANCD2 and anti-HA antibodies. (I, J) Cell cycle was analyzed in HeLa and HeLa-FANCA<sup>-/-</sup> cells after treatment with PUVA (50 nM psoralen plus 0.8 J/cm<sup>2</sup> UVA) for 24 h.

**Figure S3:  $\gamma$ H2AX foci analysis in FANCA<sup>-/-</sup> and NEIL3<sup>-/-</sup> cells upon PUVA and MMC treatments.**

(A) Representative images of immunofluorescence assays (IFA) showing  $\gamma$ H2AX foci at 0 and 24 hours after PUVA in the HeLa-WT, HeLa-FANCA<sup>-/-</sup> and HeLa-NEIL3<sup>-/-</sup> cells. (B)  $\gamma$ H2AX foci formation in HeLa and HeLa-NEIL3<sup>-/-</sup> cells after siFANCD2 and PUVA. 48 h after siControl or siFANCD2 transfection, cells were treated with PUVA and allowed to recover for 20 h before fixation and  $\gamma$ H2AX detection.  $\gamma$ H2AX foci was detected by IFA. (C) IFA images showing  $\gamma$ H2AX foci at 24 h in the HeLa, HeLa-FANCA<sup>-/-</sup> and HeLa-NEIL3<sup>-/-</sup> cells after being treated with 5 ng/mL MMC. (D) Quantification of the  $\gamma$ H2AX foci at 0, 6, and 20 h after treatment with 5 ng/mL MMC in HeLa-WT, HeLa-FANCA<sup>-/-</sup> and HeLa-NEIL3<sup>-/-</sup> cells. Data shown are mean  $\pm$  s.e.m. from three independent experiments.

**Figure S4: The recruitment of NEIL3 and FANCD2 were mutually independent.** (A) The Expression of EGFP-NEIL3 plasmids in U2OS cells was validated by Western blot. (B) UVA alone does not trigger the recruitment of NEIL3. NEIL3-EGFP was transfected into U2OS cells, and UVA laser striping was performed in the presence and absence of psoralen. Representative images and quantification of cells (n = 50) with positive NEIL3-EGFP recruitment were shown. (C) Effects of ATM, ATR, and DNPK inhibitors on NEIL3 recruitment to psoralen-ICLs. U2OS cells expressing NEIL3-EGFP were pre-incubated with 10  $\mu$ M psoralen and the

recruitment of NEIL3 was visualized 1 min after exposure to UVA laser. ATM inhibitor (KU-55933), ATR inhibitor (Berzosertib), or DNPK inhibitor (Nedisertib), was added 1 hour before laser striping. Representative images of NEIL3-EGFP recruitment and quantification of cells with positive NEIL3 recruitment to psoralene-ICL laser tracts were shown. A total of 100 cells were quantified for each group. **(D)** The Expression of EGFP-NEIL3 plasmids in U2OS cells was validated by Western blot. **(E)** The protein levels of PARP1 and PARP3 were determined after knockdown of PARP1 or PARP3 in the U2OS cells. **(F, G)** Laser striping was used to analyze the recruitment efficiency of NEIL3 (F) and FANCD2 (G) after knockdown of PARP1 or PARP3. A total of 100 cells were counted for each group. n.s., no significance, \*\*,  $p < 0.01$ ; \*\*\*,  $p < 0.001$  (paired t test). **(H)** Laser striping analysis of the recruitment of EGFP-FANCD2 in U2OS-NEIL3<sup>-/-</sup> cells. **(I)** Laser striping experiments were performed to determine the recruitment of NEIL3-EGFP in U2OS-FANCD2<sup>-/-</sup> cells.

**Figure S5: Contribution of the RUVBL1/RUVBL2 complex in ICLs repair via the NEIL3 pathway and the FA pathway.** **(A)** The NEIL3-GFP pulldown samples were separated by SDS-PAGE gel electrophoresis and were examined by silver staining. Red arrow, the bait NEIL3-GFP. UT, untreated, PUVA, psoralen plus UVA. **(B)** List of the top candidate interactors of NEIL3 from mass spectrum analysis. **(C)** Immunoblot validation of the expression of the RUVBL1-Flag and RUVBL2-Flag constructs. RUVBL1, RUVBL2 and Flag antibodies were used. **(D, E)** Laser striping to analyze the recruitment of NEIL3 (D) and FANCD2 (E) in U2OS cells after knockdown of RUVBL1 or RUVBL2 using siRNA. A total of 100 cells were counted for each group. n.s., no significance (paired t-test). **(F)** Mono-ubiquitination of FANCD2 and FANCI was analyzed in HeLa and U2OS cells after knockdown of RUVBL1 or RUVBL2 and treatment with 50 ng/ml MMC for 24 h. **(G)** RUVBL1 and RUVBL2 protein levels were analyzed in WT, *FANCA*<sup>-/-</sup>, and *FANCD2*<sup>-/-</sup> cells. **(H)** Cell cycle analysis of HeLa cells that were treated with siControl or siRUVBL1. **(I, J)** Cell viability was measured after knockdown of RUVBL1 (or RUVBL2) and treatment with MMC, in HeLa-*NEIL3*<sup>-/-</sup> (H) and HeLa-*FANCA*<sup>-/-</sup> (I) cells and their WT counterparts.

**Figure S6: NEIL3 recruitment after depletion of TRAIIP and MCM7.** **(A)** Quantitative RT-

PCR (qRT-PCR) was used to determine the knockdown efficiency of the TRAIP siRNA in HeLa cells, due to the lack of a good antibody. **(B)** HeLa cells were co-transfected with a TRAIP-Myc plasmid and siControl or siTRAIP siRNAs. The exogenous expression of TRAIP-Myc and knockdown of TRAIP were confirmed by immunoblotting the Myc-tag. **(C)** MCM7 siRNA knockdown was analyzed by immunoblot in cell lysates from HeLa. Laser striping was performed to analyze the recruitment efficiency of EGFP-NEIL3 in U2OS cells after MCM7 knockdown. A total of 100 cells were counted for each group. \*,  $p < 0.05$  (paired t test). **(D-E)** Microscopic images of NEIL3-GFP (D) and FANCD2-GFP (E) recruitment to laser stripes before and after PUVA laser. Cells were treated with indicated siRNA before PUVA laser striping.

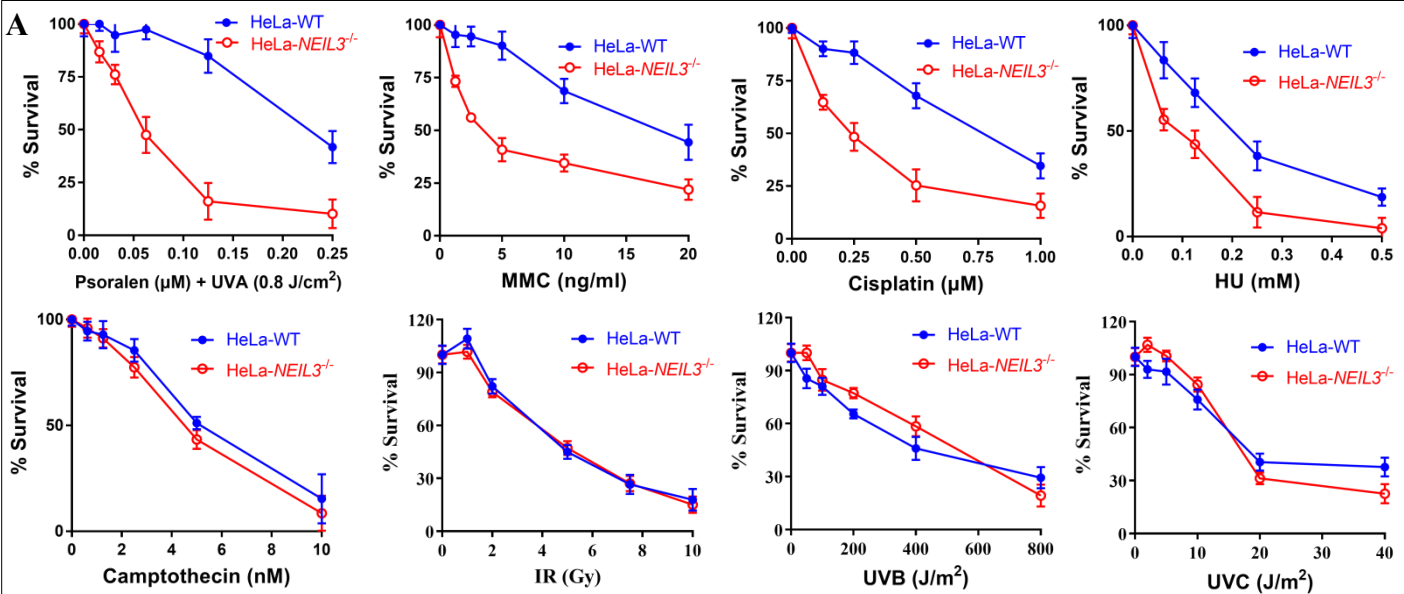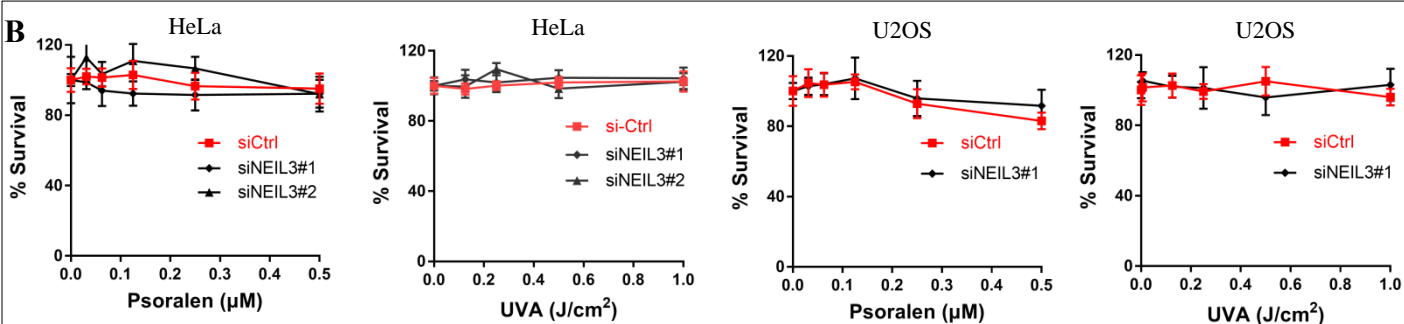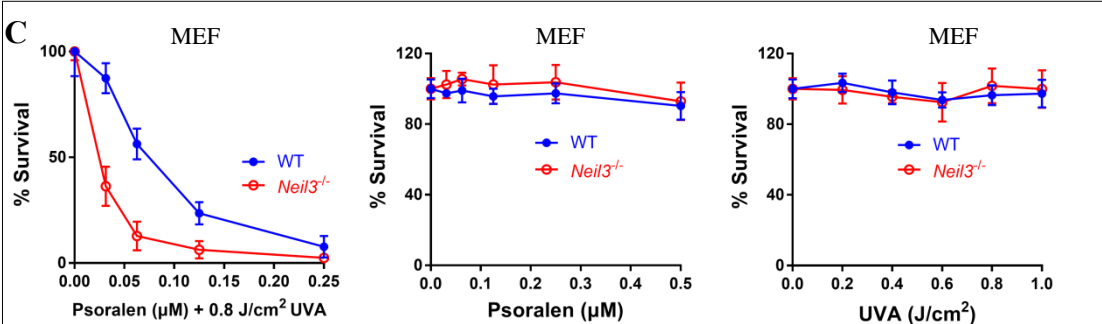

Figure S1

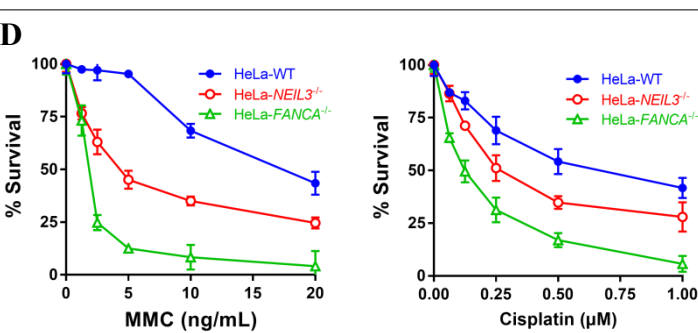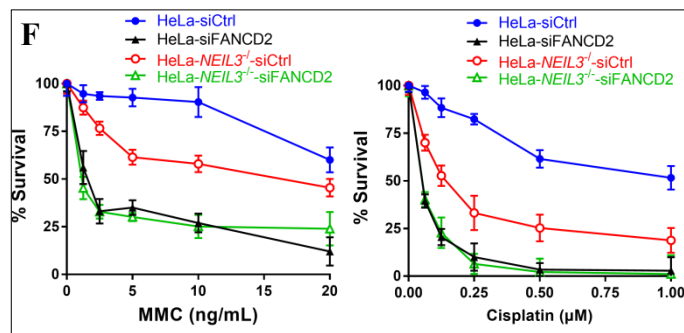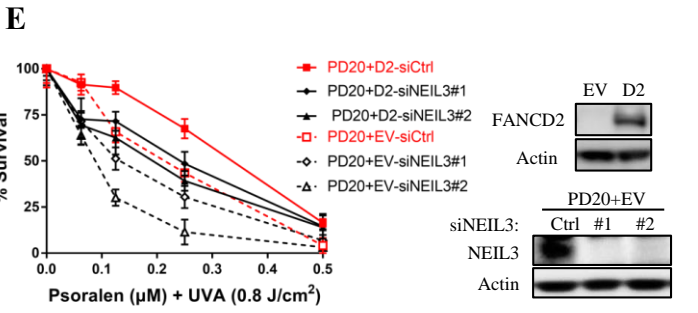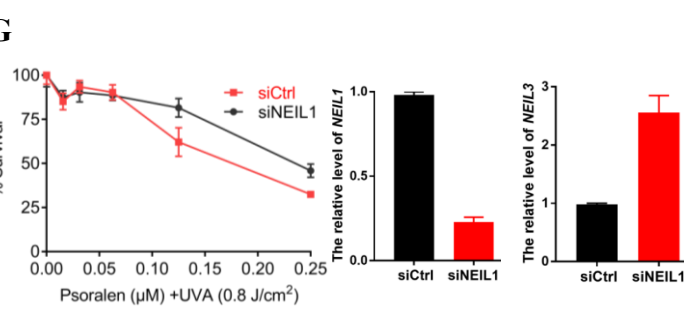

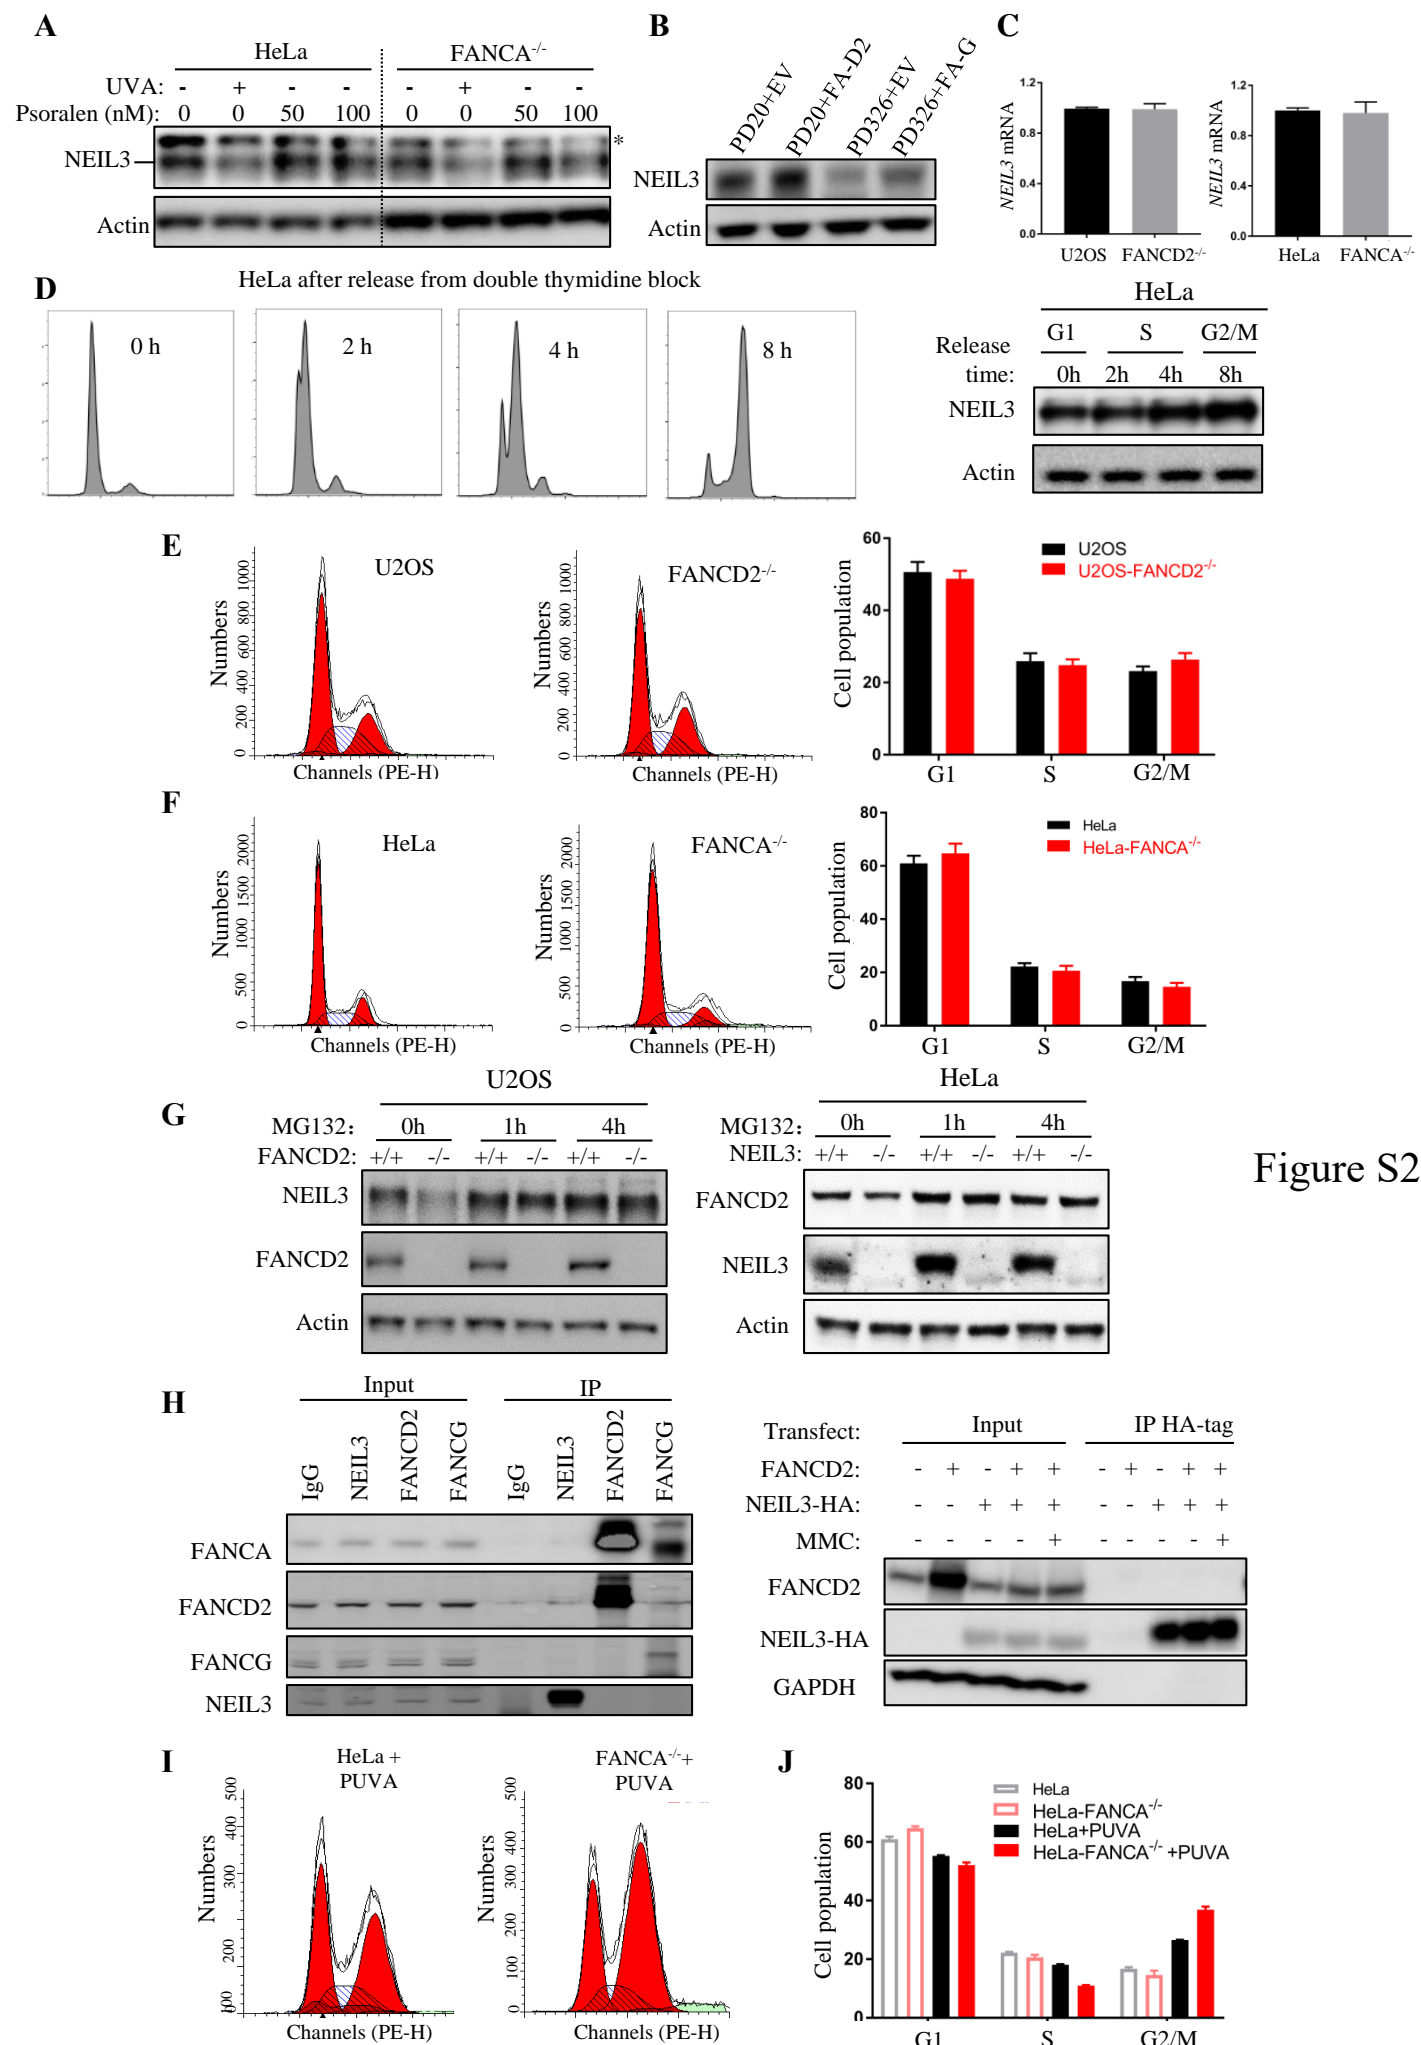

Figure S3

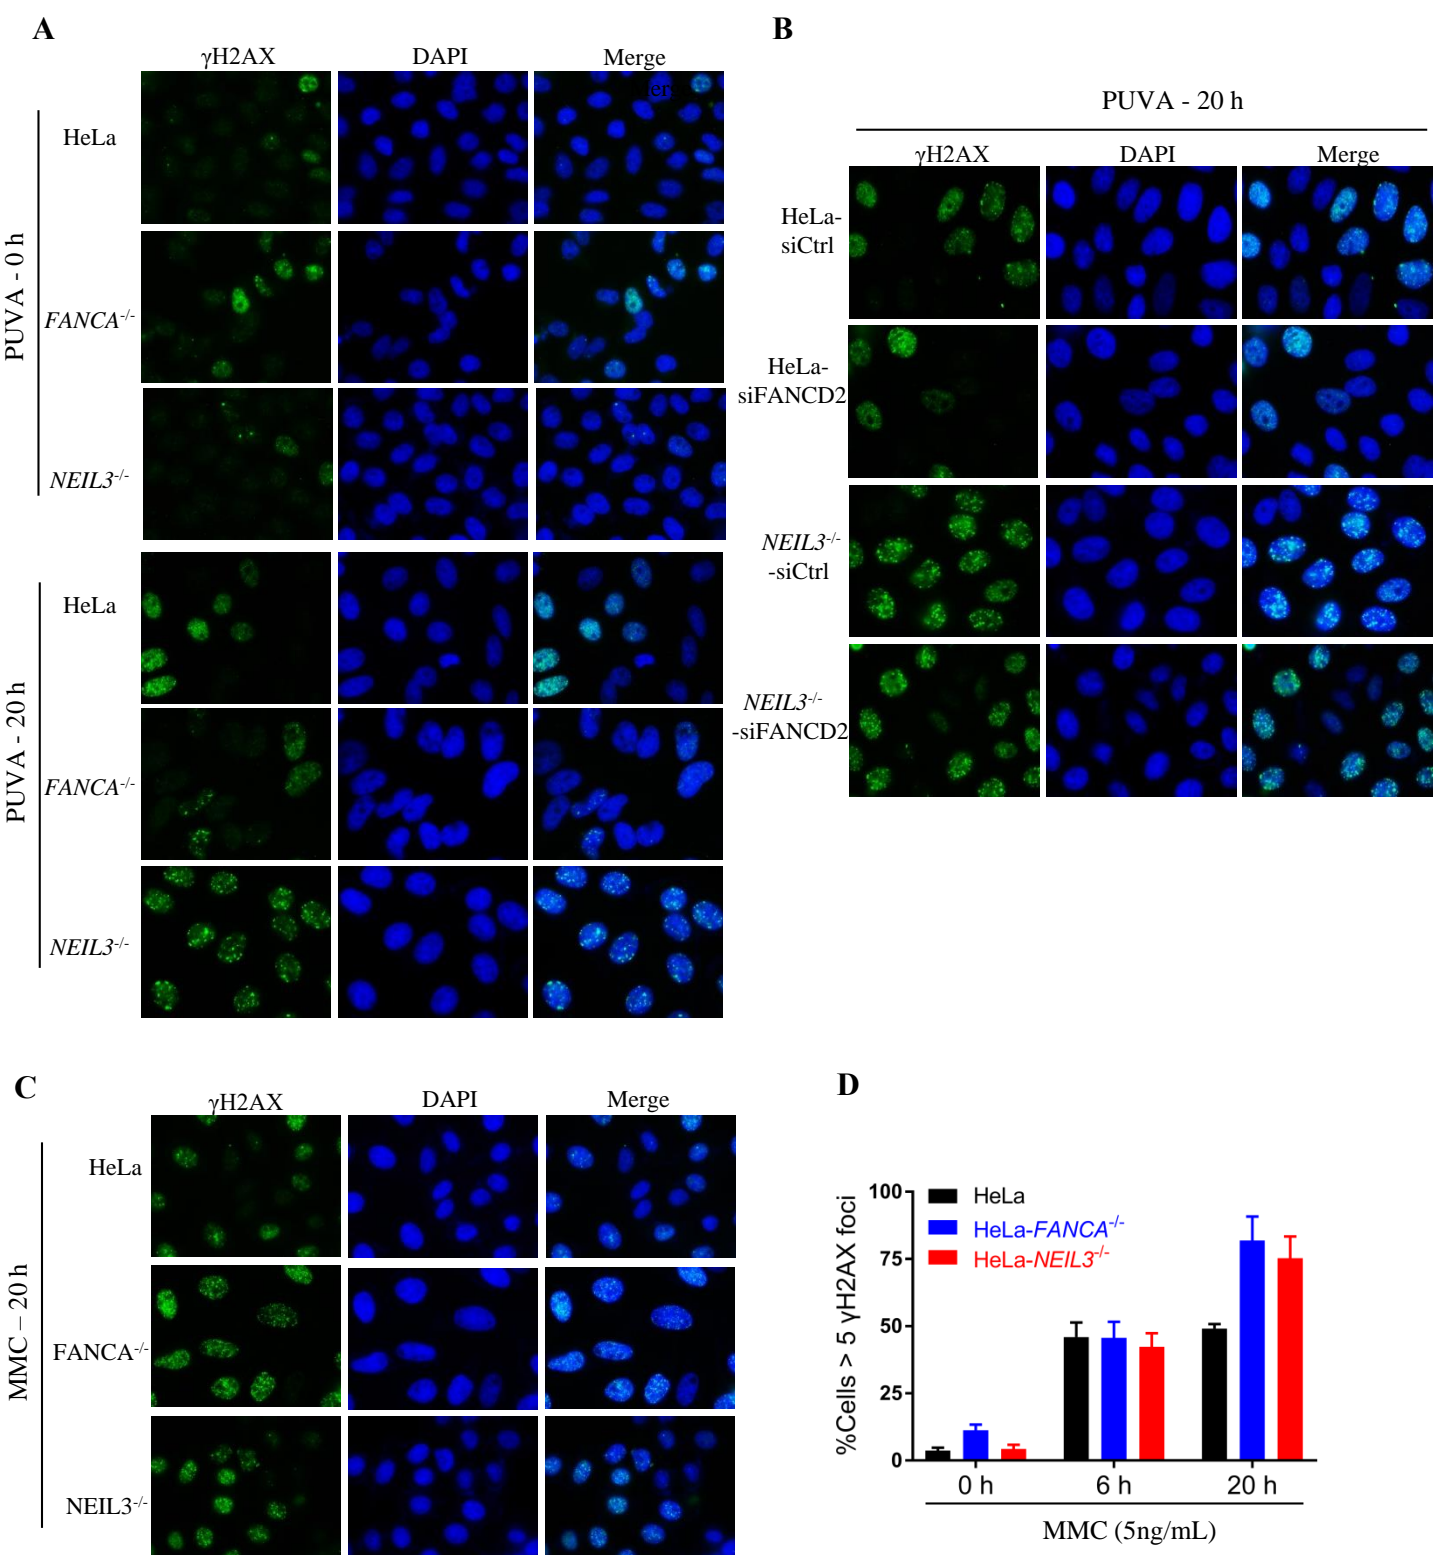



Figure S4

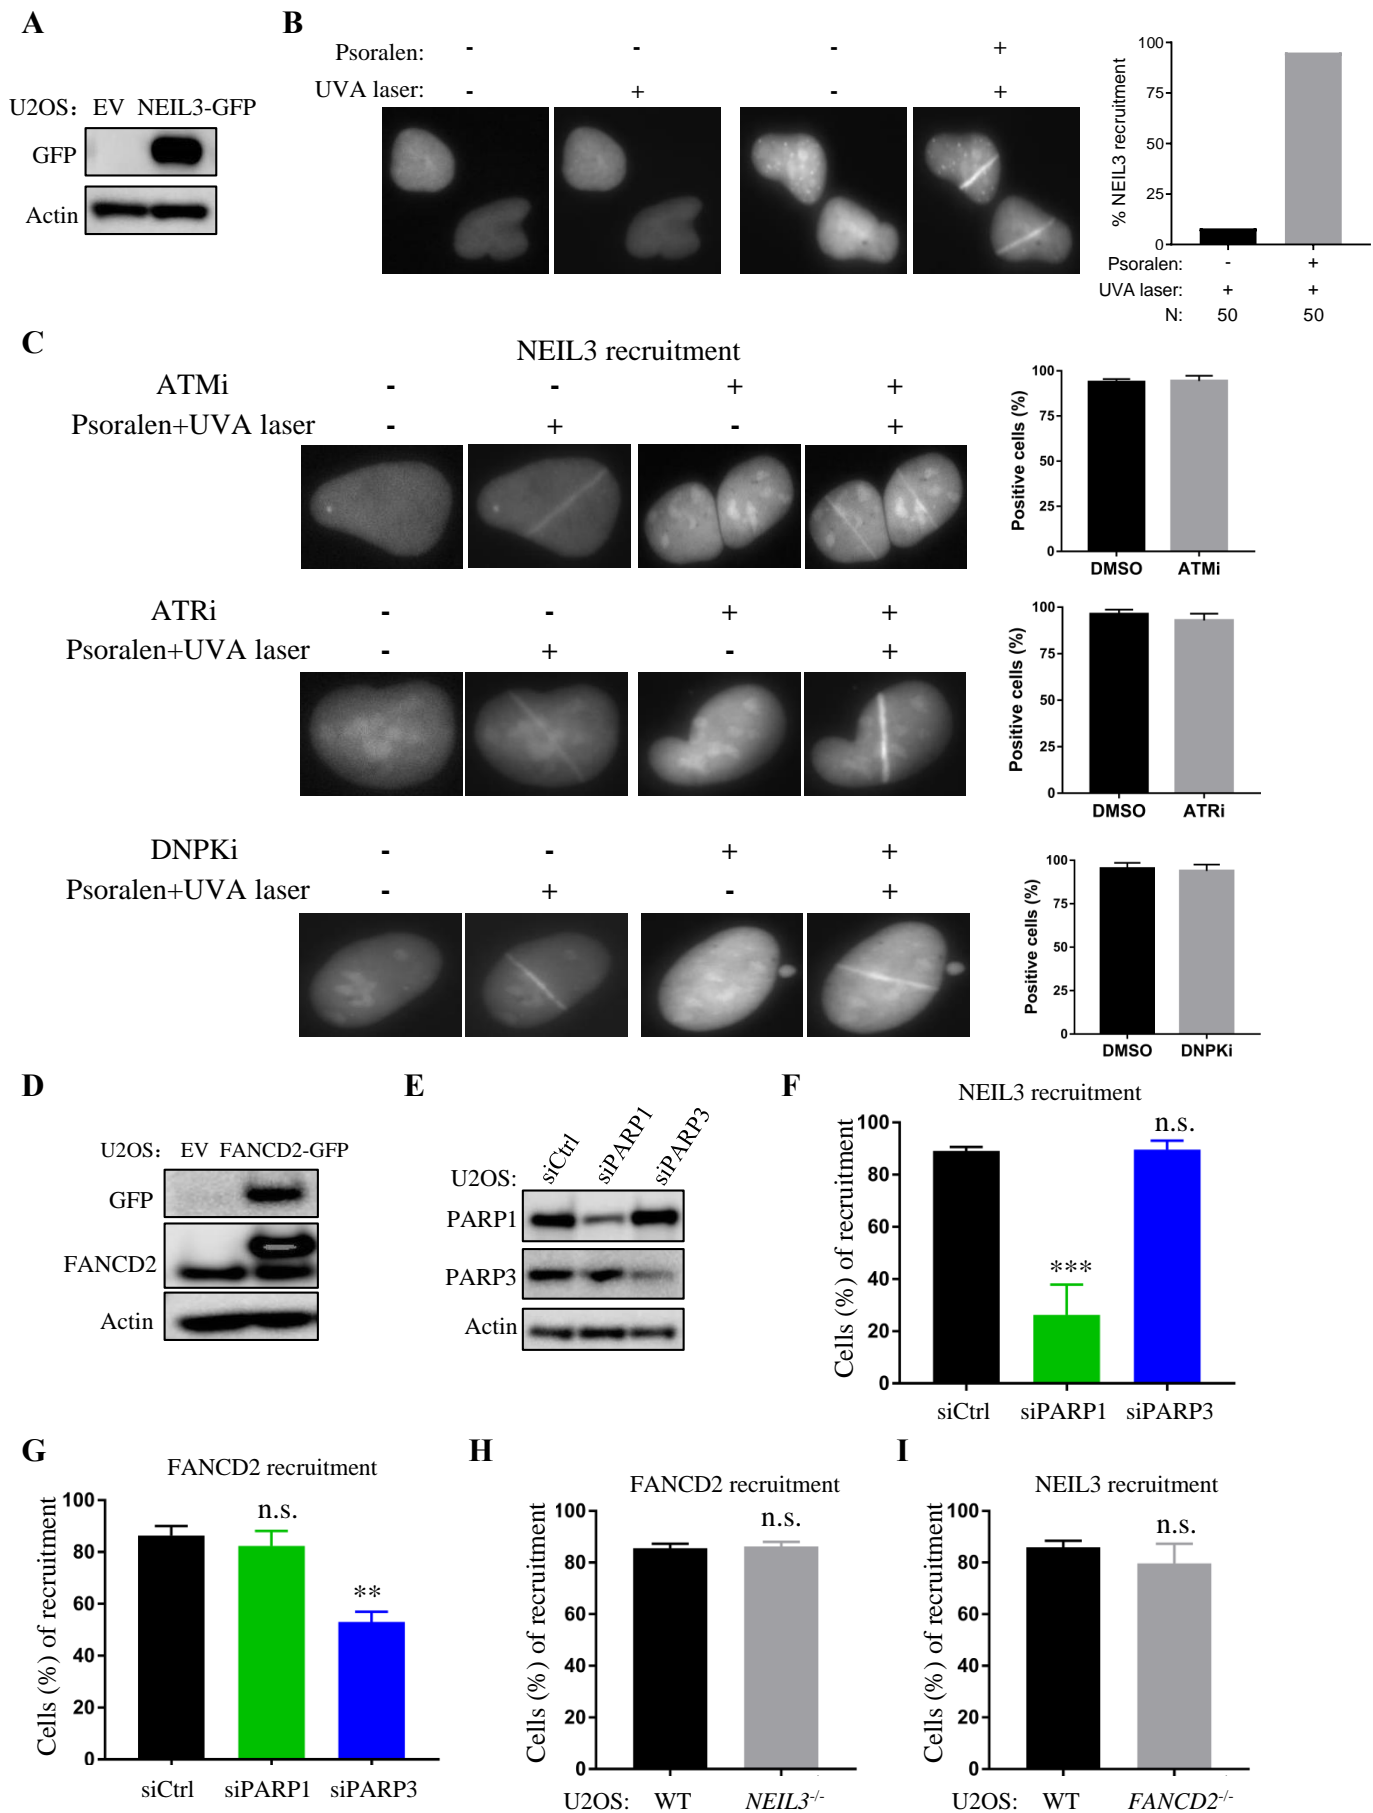

# Figure S5

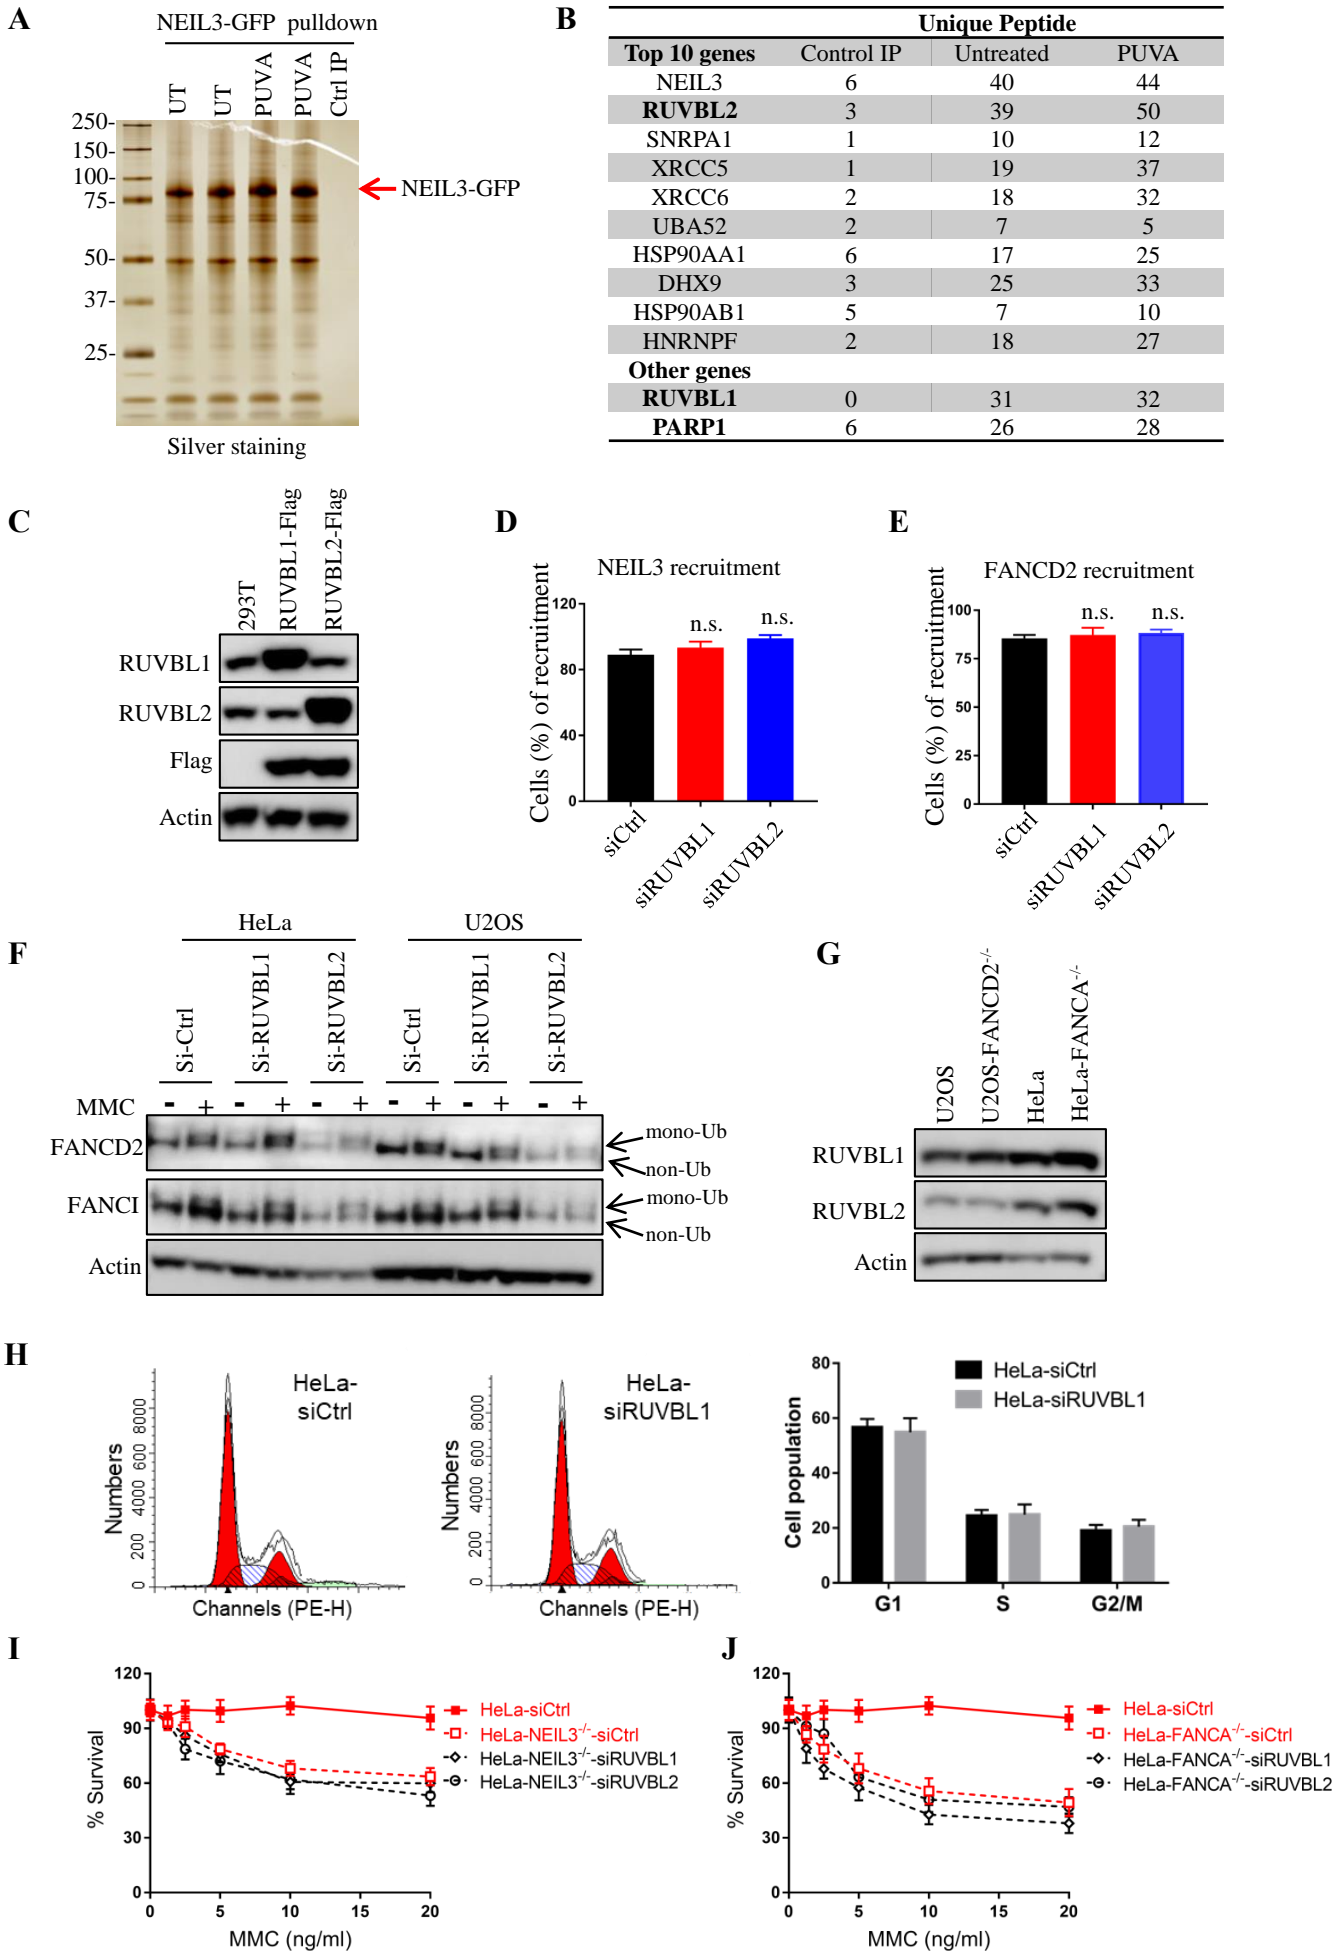

Figure S6

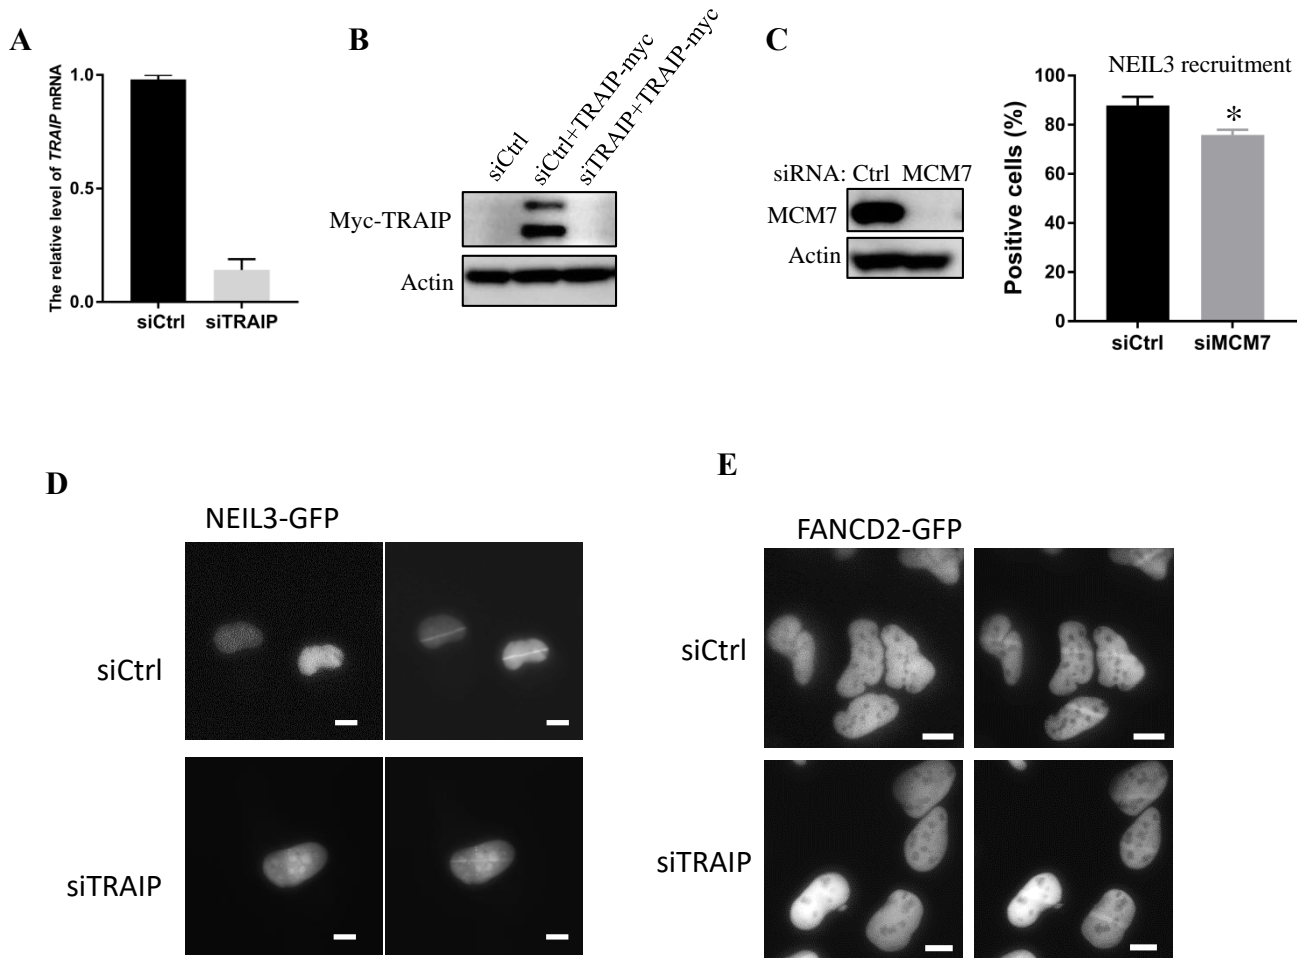

**Table S1. Sequences of the siRNAs used in this study.**

| <b>Target</b>    | <b>Supplier</b>   | <b>Sequence</b>                                              |
|------------------|-------------------|--------------------------------------------------------------|
| Negative control | Life technologies | GGGUAUCGACGAUUACAAA                                          |
| NEIL3 #1         | Life technologies | GGGUGGAUCAUGUUAUGGA                                          |
| NEIL3 #2         | Life technologies | GCUAAUGGAUCAGAACGUA                                          |
| NEIL1            | Life technologies | CGACUGUUCGUUGGUGCUUAA                                        |
| FANCA            | Life technologies | UUUUUCCCUCUUGACCCUU                                          |
| FANCD2           | Life technologies | GGCUCAGGAUUCUAAUGUA                                          |
| TRAIP            | Life technologies | AGCAGAUGAAGUACUUAGA                                          |
| PARP1            | Dharmacon         | siGENOME Human PARP1 siRNA-SMART pool<br>(M-006656-01-0005)  |
| PARP3            | Dharmacon         | siGENOME Human PARP3 siRNA-SMART pool<br>(M-009297-02-0005)  |
| MCM7             | Dharmacon         | SMARTpool: ON-TARGETplus MCM7<br>siRNA (L-003278-00-0005)    |
| RUVBL1           | Dharmacon         | siGENOME Human RUVBL1 siRNA-SMART pool<br>(M-008977-01-0005) |
| RUVBL2           | Dharmacon         | siGENOME Human RUVBL2 siRNA-SMART pool<br>(M-012299-00-0005) |
